# Supplementary material for: A facile and viable approach to fabricate polyamide membranes functionalized with graphene oxide nanosheets
Source: Royal Society of Chemistry journal article supplement (doi:10.1039/c7ra11358g), 2017-01-01
Supplement: c7ra11358g1.pdf [file c7ra11358g1.pdf]

## **Supporting information**

### **A facile and viable approach to fabricate polyamide membranes functionalized with graphene oxide nanosheets**

Ruizhi Pang and Kaisong Zhang \*

Key Laboratory of Urban Pollutant Conversion, Institute of Urban Environment,

Chinese Academy of Sciences, Xiamen 361021, China

Corresponding author: [kszhang@iue.ac.cn](mailto:kszhang@iue.ac.cn).

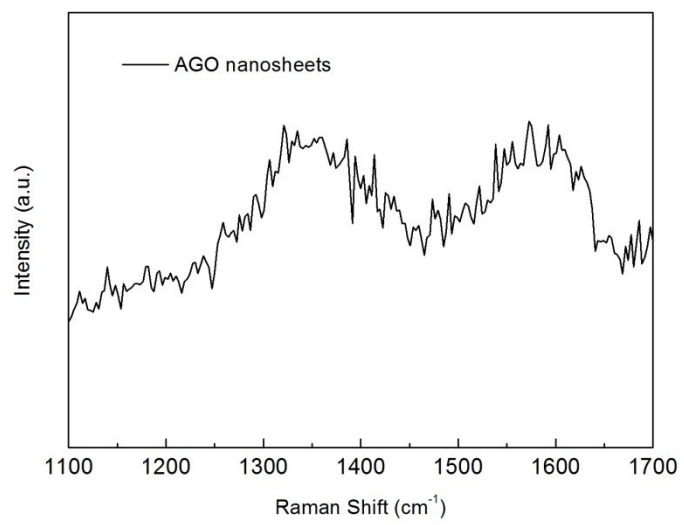

Fig. S1. Raman spectrum of aminated GO nanosheets.

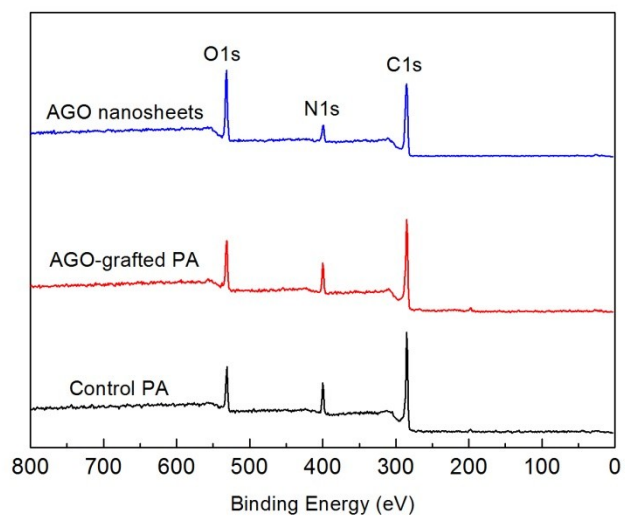

Fig. S2. XPS spectra of aminated GO nanosheets, control PA membrane and PA membrane functionalized with 0.15% AGO nanosheets.

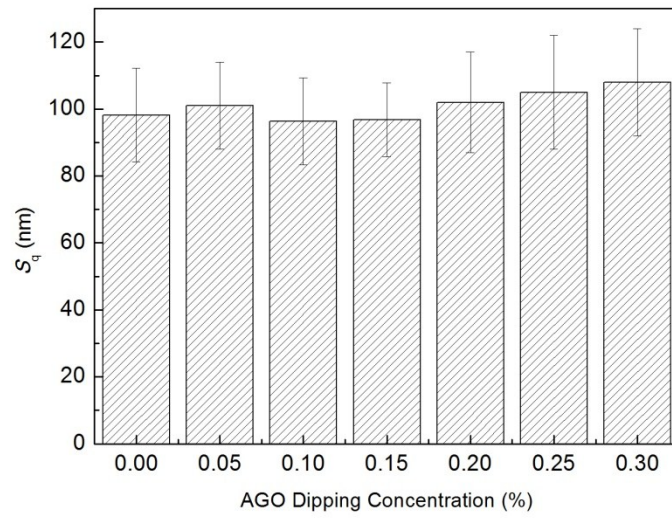

Fig. S3. Root mean squared roughness ( $S_q$ ) of PA membranes functionalized with different AGO nanosheets dipping concentration.
